# Supplementary material for: Integrated low carbon H2 conversion with in situ carbon mineralization from aqueous biomass oxygenate precursors by tuning reactive multiphase chemical interactions
Source: Royal Society of Chemistry journal article supplement (doi:10.1039/d2re00542e), 2023-01-01
Supplement: d2re00542e1.pdf [file d2re00542e1.pdf]

1  
2  
3  
4  
5  
6  
7  
8  
9  
10  
11  
12  
13  
14  
15  
16

# SUPPLEMENTARY INFORMATION

for

*Integrated Low Carbon H<sub>2</sub> Conversion with In-Situ Carbon  
Mineralization from Aqueous Biomass Oxygenate Precursors by  
Tuning Reactive Multiphase Chemical Interactions*

*Prince Ochonma,<sup>1</sup> Christopher Noe,<sup>2</sup> Akanksh Mamidala,<sup>3</sup> Sohaib Mohammed,<sup>3</sup>  
and Greeshma Gadikota<sup>1,3\*</sup>*

<sup>1</sup>Robert Frederick Smith School of Chemical and Biomolecular Engineering, Cornell University, 113 Ho Plaza, Ithaca, NY 14853

<sup>2</sup>Department of Chemistry, College of Art and Science, Stony Brook University, Stony Brook, NY 11790

<sup>3</sup>School of Civil and Environmental Engineering, Cornell University, 527 College Avenue, 117 Hollister Hall, Ithaca, NY 14853

---

\* Corresponding Author. Phone: +1 607-255-4796. E-mail: [gg464@cornell.edu](mailto:gg464@cornell.edu)

## 1 *Extent of carbon mineralization*

2 In this study, the estimation of the extent of carbonation was done using both TGA (Thermo  
3 Gravimetric Analysis) and TCA (Total Carbon Analysis). The TGA method provided an insight  
4 into the presence of different solid phases (e.g., carbonate and hydrate phases as well as organic  
5 carbon with distinct decomposition temperature) and the quantification of each phase in the  
6 analyzed sample. The TGA technique can be difficult for samples with overlapping weight drop  
7 curves. Thus, the TGA method should be used for samples with clear distinction between weight  
8 drop curves, and this was the case for carbonated samples in this study. The total carbon reported  
9 from the TCA [g of C/g of carbonated solids] was converted into the extent of carbonation by  
10 comparing the TCA data with the theoretical carbon capture capacity of the minerals.

11 The determination of the extent of the carbon mineralization with the ladle slag was challenged by  
12 the heterogeneous compositions of slag samples. Thus, the extent of mineral carbonation is  
13 calculated and estimated based on a careful determination of the chemical phases. First, only Ca-  
14 and Mg- based oxides and silicates which make up > 65 wt.% of NuLD (**Table 1**) are considered  
15 to react and produce Ca- and Mg-carbonates, while other metals such as Fe and Al are considered  
16 unlikely to dissolve at pH greater than 7.5 and react to produce respective carbonates. For example,  
17 Iron oxides can react with CO<sub>2</sub> to form siderite (FeCO<sub>3</sub>), however, it has been reported that the  
18 formation of siderite is inhibited by the low solubility of iron oxide .<sup>43</sup> Second, only non-  
19 carbonated Ca and Mg species are considered for carbon mineralization. The pH of NuLD in  
20 solution used in this study was measured to be 12.17. Dissolution of solid calcium and magnesium  
21 carbonate at pH greater than 7.5 in material systems bearing alkaline industrial residues and  
22 solvents is negligible.<sup>40</sup> Based on the above assumptions, the extent of carbon mineralization was

1 calculated. Where the TGA method was used to analyze the carbonated solids, Eq. (2) was used to  
2 determine the extent of carbon mineralization. On the other hand, Eq. (3) was used when TCA was  
3 used for the solid analysis.

$$4 \text{ Extent of carbon mineralization (\%)} = \frac{\frac{TGA}{(1-TGA)}}{\text{theoretical maximum CO}_2 \text{ storage capacity}} \times 100(\%) \quad (\text{S1})$$

$$5 \text{ Extent of carbon mineralization (\%)} = \frac{\frac{3.67 \cdot TCA}{(1-3.67 \cdot TCA)}}{\text{theoretical maximum CO}_2 \text{ storage capacity}} \times 100(\%) \quad (\text{S2})$$

6 TGA in **Eq. (S1)** represents the percent weight change of the carbonated solid at its calcination  
7 temperature, and TCA in **Eq. (S2)** represents the weight fraction of carbon in the carbonated  
8 sample with a unit of (weight of carbon/ weight of sample). The coefficient 3.67 is introduced  
9 into **Eq. (S2)** to account for the ratio of the molecular weights of CO<sub>2</sub> to carbon. In reactions  
10 where ladle slag was used as the alkaline sorbent, the theoretical maximum CO<sub>2</sub> capacity was  
11 calculated after subtracting the initial amount of residual CO<sub>2</sub> which was estimated to be 0.02 g (±  
12 2%) CO<sub>2</sub> per g of NuLD.

13  
14  
15  
16  
17  
18  
19  
20  
21

1 **Table S1.** Reactions involved with complete conversions of various biomass oxygenates with  
 2 and without an alkaline sorbent. *M* represents either Ca or Mg metal.

| Biomass Oxygenates                                               | Reaction stoichiometry                                                                                                                                                                 |
|------------------------------------------------------------------|----------------------------------------------------------------------------------------------------------------------------------------------------------------------------------------|
| Methanol (CH <sub>3</sub> OH)                                    | $\text{CH}_4\text{O}_{(\text{aq})} + \text{H}_2\text{O}_{(\text{l})} \rightarrow \text{CO}_{2(\text{g})} + 3\text{H}_{2(\text{g})}$                                                    |
| Ethylene glycol (C <sub>2</sub> H <sub>6</sub> O <sub>2</sub> )  | $\text{C}_2\text{H}_6\text{O}_{2(\text{aq})} + 2\text{H}_2\text{O}_{(\text{l})} \rightarrow 2\text{CO}_{2(\text{g})} + 5\text{H}_{2(\text{g})}$                                        |
| Glycerol (C <sub>3</sub> H <sub>8</sub> O <sub>3</sub> )         | $\text{C}_3\text{H}_8\text{O}_{3(\text{aq})} + 3\text{H}_2\text{O}_{(\text{l})} \rightarrow 3\text{CO}_{2(\text{g})} + 7\text{H}_{2(\text{g})}$                                        |
| Acetate Sodium (C <sub>2</sub> H <sub>3</sub> O <sub>2</sub> Na) | $\text{C}_2\text{H}_3\text{O}_2\text{Na}_{(\text{aq})} + 3\text{H}_2\text{O}_{(\text{l})} \rightarrow \text{CO}_{2(\text{g})} + 4\text{H}_{2(\text{g})} + \text{NaHCO}_{3(\text{aq})}$ |
| Formate (CH <sub>2</sub> O <sub>2</sub> Na)                      | $\text{CHO}_2\text{Na}_{(\text{aq})} + \text{H}_2\text{O}_{(\text{l})} \rightarrow \text{H}_{2(\text{g})} + \text{NaHCO}_{3(\text{aq})}$                                               |

3

| Biomass Oxygenates                                               | Reaction stoichiometry with in-situ CO <sub>2</sub> capture                                                                                                                                                                 |
|------------------------------------------------------------------|-----------------------------------------------------------------------------------------------------------------------------------------------------------------------------------------------------------------------------|
| Methanol (CH <sub>3</sub> OH)                                    | $\text{CH}_4\text{O}_{(\text{aq})} + \text{M}(\text{OH})_{2(\text{aq})} \rightarrow \text{MCO}_{3(\text{s})} + 3\text{H}_{2(\text{g})}$                                                                                     |
| Ethylene glycol (C <sub>2</sub> H <sub>6</sub> O <sub>2</sub> )  | $\text{C}_2\text{H}_6\text{O}_{2(\text{aq})} + 2\text{M}(\text{OH})_{2(\text{aq})} \rightarrow 2\text{MCO}_{3(\text{s})} + 5\text{H}_{2(\text{g})}$                                                                         |
| Glycerol (C <sub>3</sub> H <sub>8</sub> O <sub>3</sub> )         | $\text{C}_3\text{H}_8\text{O}_{3(\text{aq})} + 3\text{M}(\text{OH})_{2(\text{aq})} \rightarrow 3\text{MCO}_{3(\text{s})} + 7\text{H}_{2(\text{g})}$                                                                         |
| Acetate Sodium (C <sub>2</sub> H <sub>3</sub> O <sub>2</sub> Na) | $\text{C}_2\text{H}_3\text{O}_2\text{Na}_{(\text{aq})} + 2\text{M}(\text{OH})_{2(\text{aq})} + \text{H}_2\text{O}_{(\text{l})} \rightarrow 2\text{MCO}_{3(\text{s})} + 4\text{H}_{2(\text{g})} + \text{NaOH}_{(\text{aq})}$ |
| Formate (CH <sub>2</sub> O <sub>2</sub> Na)                      | $\text{CHO}_2\text{Na}_{(\text{aq})} + \text{M}(\text{OH})_{2(\text{aq})} \rightarrow \text{MCO}_{3(\text{s})} + \text{H}_{2(\text{g})} + \text{NaOH}_{(\text{aq})}$                                                        |

4

5

6

7

8

9

10

11

1

**Table S2.** Gas product yields for hydrothermal conversion of biomass oxygenates with and without an alkaline sorbent.

| Oxygenate | Catalyst                          | Reactor<br>Mode | Time<br>(hours) | Yield<br>H <sub>2</sub> | Yield<br>CO <sub>2</sub> | Yield<br>CH <sub>4</sub> | Yield<br>CO | Yield<br>MCO <sub>3</sub> |
|-----------|-----------------------------------|-----------------|-----------------|-------------------------|--------------------------|--------------------------|-------------|---------------------------|
| Methanol  | No Catalyst                       | NA              | 1               | 0.05(±0.01)             | 0.1(±0.01)               | 0.0(±0.0)                | 0.00(±0.00) | 0.00(±0.00)               |
| Methanol  | No Catalyst                       | NA              | 3               | 0.41(±0.05)             | 0.97(±0.11)              | 0.0(±0.0)                | 0.00(±0.00) | 0.00(±0.00)               |
| Methanol  | No Catalyst                       | NA              | 6               | 0.97(±0.10)             | 2.39(±0.25)              | 0.0(±0.0)                | 0.00(±0.00) | 0.00(±0.00)               |
| Methanol  | No Catalyst                       | M1              | 1               | 0.31(±0.05)             | 0.00(±0.00)              | 0.0(±0.0)                | 0.00(±0.00) | 5.35(±1.13)               |
| Methanol  | No Catalyst                       | M1              | 3               | 0.88(±0.09)             | 0.01(±0.01)              | 0.0(±0.0)                | 0.00(±0.00) | 5.89(±1.82)               |
| Methanol  | No Catalyst                       | M1              | 6               | 3.21(±0.35)             | 0.00(±0.00)              | 0.0(±0.0)                | 0.00(±0.00) | 10.91(±0.68)              |
| Methanol  | No Catalyst                       | M2              | 1               | 0.11(±0.01)             | 0.00(±0.00)              | 0.0(±0.0)                | 0.00(±0.00) | 4.79(±0.64)               |
| Methanol  | No Catalyst                       | M2              | 3               | 3.45(±0.39)             | 0.00(±0.00)              | 0.0(±0.0)                | 0.00(±0.00) | 5.35(±1.40)               |
| Methanol  | No Catalyst                       | M2              | 6               | 4.82(±0.54)             | 0.40(±0.07)              | 0.0(±0.0)                | 0.00(±0.00) | 10.58(±4.33)              |
| Methanol  | Pt/Al <sub>2</sub> O <sub>3</sub> | NA              | 1               | 54.80(±8.08)            | 61.16(±8.53)             | 0.99(±0.14)              | 0.00(±0.00) | 0.00(±0.00)               |
| Methanol  | Pt/Al <sub>2</sub> O <sub>3</sub> | NA              | 3               | 56.85(±6.76)            | 59.00(±6.98)             | 1.08(±0.13)              | 0.00(±0.00) | 0.00(±0.00)               |
| Methanol  | Pt/Al <sub>2</sub> O <sub>3</sub> | NA              | 6               | 64.49(±6.92)            | 70.42(±7.49)             | 1.33(±0.14)              | 0.54(±0.69) | 0.00(±0.00)               |
| Methanol  | Pt/Al <sub>2</sub> O <sub>3</sub> | M1              | 1               | 67.97(±7.40)            | 0.03(±0.01)              | 0.04(±0.08)              | 0.00(±0.00) | 77.35(±8.30)              |
| Methanol  | Pt/Al <sub>2</sub> O <sub>3</sub> | M1              | 3               | 73.06(±8.48)            | 0.04(±0.01)              | 0.13(±0.01)              | 0.00(±0.00) | 77.19(±8.49)              |
| Methanol  | Pt/Al <sub>2</sub> O <sub>3</sub> | M1              | 6               | 76.23(±8.20)            | 0.11(±0.02)              | 0.19(±0.02)              | 0.00(±0.00) | 88.37(±7.24)              |
| Methanol  | Pt/Al <sub>2</sub> O <sub>3</sub> | M2              | 1               | 35.03(±3.94)            | 7.28(±2.41)              | 0.83(±0.10)              | 0.00(±0.00) | 24.71(±2.10)              |
| Methanol  | Pt/Al <sub>2</sub> O <sub>3</sub> | M2              | 3               | 70.96(±8.82)            | 2.51(±0.55)              | 0.44(±0.05)              | 0.00(±0.00) | 62.83(±10.07)             |
| Methanol  | Pt/Al <sub>2</sub> O <sub>3</sub> | M2              | 6               | 71.34(±6.07)            | 2.83(±1.67)              | 0.44(±0.02)              | 0.00(±0.00) | 81.89(±1.35)              |

|                 |                                   |    |   |              |              |              |             |               |
|-----------------|-----------------------------------|----|---|--------------|--------------|--------------|-------------|---------------|
| Methanol        | Ni/Al <sub>2</sub> O <sub>3</sub> | NA | 1 | 18.31(±1.95) | 32.26(±4.13) | 20.79(±2.21) | 0.00(±0.00) | 0.00(±0.00)   |
| Methanol        | Ni/Al <sub>2</sub> O <sub>3</sub> | NA | 3 | 16.27(±2.59) | 45.18(±6.23) | 50.46(±7.38) | 0.00(±0.00) | 0.00(±0.00)   |
| Methanol        | Ni/Al <sub>2</sub> O <sub>3</sub> | NA | 6 | 12.59(±1.81) | 44.15(±5.88) | 57.89(±8.43) | 0.00(±0.00) | 0.00(±0.00)   |
| Methanol        | Ni/Al <sub>2</sub> O <sub>3</sub> | M1 | 1 | 56.43(±6.11) | 0.02(±0.01)  | 5.63(±0.64)  | 0.00(±0.00) | 73.09(±4.74)  |
| Methanol        | Ni/Al <sub>2</sub> O <sub>3</sub> | M1 | 3 | 59.47(±6.24) | 0.02(±0.00)  | 5.43(±0.56)  | 0.00(±0.00) | 78.86(±7.89)  |
| Methanol        | Ni/Al <sub>2</sub> O <sub>3</sub> | M1 | 6 | 57.04(±6.08) | 0.50(±0.16)  | 6.78(±1.41)  | 0.00(±0.00) | 72.40(±11.41) |
| Methanol        | Ni/Al <sub>2</sub> O <sub>3</sub> | M2 | 1 | 20.88(±2.23) | 1.16(±0.30)  | 3.95(±0.46)  | 0.00(±0.00) | 60.93(±1.45)  |
| Methanol        | Ni/Al <sub>2</sub> O <sub>3</sub> | M2 | 3 | 48.58(±4.84) | 0.09(±0.01)  | 5.01(±0.46)  | 0.00(±0.00) | 65.00(±2.08)  |
| Methanol        | Ni/Al <sub>2</sub> O <sub>3</sub> | M2 | 6 | 74.77(±7.54) | 0.59(±0.17)  | 2.95(±0.31)  | 0.00(±0.00) | 79.98(±10.05) |
| Formate         | Ni/Al <sub>2</sub> O <sub>3</sub> | NA | 3 | 44.74(±9.05) | 7.14(±0.78)  | 4.50(±1.02)  | 0.00(±0.00) | 0.00(±0.00)   |
| Formate         | Ni/Al <sub>2</sub> O <sub>3</sub> | M2 | 3 | 65.21(±3.86) | 0.04(±0.04)  | 1.15(±0.06)  | 0.00(±0.00) | 63.52(±0.34)  |
| Formate         | Pt/Al <sub>2</sub> O <sub>3</sub> | NA | 3 | 71.36(±4.02) | 15.11(±1.02) | 0.22(±0.02)  | 0.00(±0.00) | 0.00(±0.00)   |
| Formate         | Pt/Al <sub>2</sub> O <sub>3</sub> | M2 | 3 | 73.05(±4.54) | 2.26(±1.54)  | 0.2(±0.02)   | 0.00(±0.00) | 72.28(±2.38)  |
| Acetate         | Ni/Al <sub>2</sub> O <sub>3</sub> | NA | 3 | 2.14(±0.57)  | 1.88(±0.32)  | 0.71(±0.21)  | 0.00(±0.00) | 0.00(±0.00)   |
| Acetate         | Ni/Al <sub>2</sub> O <sub>3</sub> | M2 | 3 | 8.34(±0.78)  | 1.14(±0.17)  | 13.83(±1.20) | 0.00(±0.00) | 19.55(±2.21)  |
| Acetate         | Pt/Al <sub>2</sub> O <sub>3</sub> | NA | 3 | 3.25(±0.30)  | 12.31(±1.05) | 33.47(±2.96) | 0.00(±0.00) | 0.00(±0.00)   |
| Acetate         | Pt/Al <sub>2</sub> O <sub>3</sub> | M2 | 3 | 9.34(±0.91)  | 0.83(±0.22)  | 13.57(±1.17) | 0.00(±0.00) | 36.52(±2.29)  |
| Glycerol        | Ni/Al <sub>2</sub> O <sub>3</sub> | NA | 3 | 15.15(±0.19) | 44.11(±1.99) | 32.14(±1.28) | 0.00(±0.00) | 0.00(±0.00)   |
| Glycerol        | Ni/Al <sub>2</sub> O <sub>3</sub> | M2 | 3 | 73.38(±3.29) | 0.12(±0.01)  | 7.09(±0.41)  | 0.00(±0.00) | 73.94(±9.59)  |
| Glycerol        | Pt/Al <sub>2</sub> O <sub>3</sub> | NA | 3 | 49.88(±0.29) | 61.89(±1.05) | 15.74(±0.03) | 0.00(±0.00) | 0.00(±0.00)   |
| Glycerol        | Pt/Al <sub>2</sub> O <sub>3</sub> | M2 | 3 | 68.59(±0.43) | 1.86(±0.09)  | 6.64(±0.05)  | 0.00(±0.00) | 77.06(±11.86) |
| Ethylene Glycol | Ni/Al <sub>2</sub> O <sub>3</sub> | NA | 3 | 19.16(±0.23) | 46.33(±2.09) | 30.18(±0.18) | 0.00(±0.00) | 0.00(±0.00)   |

---

|                 |                                   |    |   |              |              |             |             |              |
|-----------------|-----------------------------------|----|---|--------------|--------------|-------------|-------------|--------------|
| Ethylene Glycol | Ni/Al <sub>2</sub> O <sub>3</sub> | M2 | 3 | 90.90(±0.02) | 0.48(±0.01)  | 3.68(±0.02) | 0.00(±0.00) | 85.27(±2.44) |
| Ethylene Glycol | Pt/Al <sub>2</sub> O <sub>3</sub> | NA | 3 | 79.48(±1.12) | 90.32(±1.28) | 2.11(±0.04) | 0.00(±0.00) | 0.00(±0.00)  |
| Ethylene Glycol | Pt/Al <sub>2</sub> O <sub>3</sub> | M2 | 3 | 85.50(±0.72) | 1.10(±0.18)  | 0.43(±0.01) | 0.00(±0.00) | 97.52(±1.15) |

---

1

2

3

1 **Table S3.** Summary of the Reactions Representing water dissociation and CO<sub>2</sub> hydration

| Phenomena                       | Reactions                                                                                 | Equilibrium Constant |
|---------------------------------|-------------------------------------------------------------------------------------------|----------------------|
| <b>Water dissociation</b>       | $\text{H}_2\text{O}_{(l)} \rightarrow \text{H}^+_{(aq)} + \text{OH}^-_{(aq)}$             | $K_w = 10^{-13.997}$ |
|                                 | $\text{CO}_{2(aq)} + \text{H}_2\text{O}_{(l)} \rightarrow \text{H}_2\text{CO}_3^*_{(aq)}$ | $k_1 = 10^{-1.46}$   |
| <b>CO<sub>2</sub> hydration</b> | $\text{H}_2\text{CO}_3^*_{(aq)} \rightarrow \text{HCO}_3^-_{(aq)} + \text{H}^+_{(aq)}$    | $k_2 = 10^{-6.33}$   |
|                                 | $\text{HCO}_3^-_{(aq)} \rightarrow \text{CO}_3^{2-}_{(aq)} + \text{H}^+_{(aq)}$           | $k_3 = 10^{-10.33}$  |

2

3 To calculate the partial pressure of CO<sub>2</sub> in this systems, the maximum possible concentration of  
 4 CO<sub>2</sub> was obtained by assuming complete conversion of methanol in Reaction 1, S.I Table 1 . The  
 5 concentrations of carbonic acid, bicarbonate (HCO<sup>3-</sup>), and carbonate (CO<sub>3</sub><sup>2-</sup>) species at total  
 6 carbon supply between 0 – 1.05 M was computed using the equations below and the distribution  
 7 is shown in S.I Figure 1.

8

$$9 \quad [\text{HCO}_3^-_{(aq)}] = ([\text{H}_2\text{CO}_3^*_{(aq)}] * k_2) / [\text{H}^+_{(aq)}] \quad (\text{S.I } 1)$$

$$10 \quad [\text{CO}_3^{2-}_{(aq)}] = ([\text{HCO}_3^-_{(aq)}] * k_3) / [\text{H}^+_{(aq)}] \quad (\text{S.I } 2)$$

$$11 \quad C_{\text{TOT}} = [\text{H}_2\text{CO}_3^*_{(aq)}] + [\text{HCO}_3^-_{(aq)}] + [\text{CO}_3^{2-}_{(aq)}] \quad (\text{S.I } 3)$$

$$12 \quad [\text{H}_2\text{CO}_3^*_{(aq)}] = C_{\text{TOT}} / ( 1 + (k_2 / [\text{H}^+_{(aq)}]) + ((k_2 * k_3) / ([\text{H}^+_{(aq)}]^2)) \quad (\text{S.I } 4)$$

13

14

15

16



1

**Table S4.** pH distribution of solutions.

| <b>Phenomena</b>                                                 | <b>pH of feedstock solution without<br/>Ca(OH)<sub>2</sub> in aqueous phase</b> | <b>pH of feedstock solution with<br/>Ca(OH)<sub>2</sub> in aqueous phase</b> |
|------------------------------------------------------------------|---------------------------------------------------------------------------------|------------------------------------------------------------------------------|
| Methanol (CH <sub>3</sub> OH)                                    | 6.43                                                                            | 12.27                                                                        |
| Ethylene glycol (C <sub>2</sub> H <sub>6</sub> O <sub>2</sub> )  | 4.88                                                                            | 12.25                                                                        |
| Glycerol (C <sub>3</sub> H <sub>8</sub> O <sub>3</sub> )         | 5.09                                                                            | 12.25                                                                        |
| Acetate Sodium (C <sub>2</sub> H <sub>3</sub> O <sub>2</sub> Na) | 7.67                                                                            | 12.27                                                                        |
| Formate (CH <sub>2</sub> O <sub>2</sub> Na)                      | 7.56                                                                            | 12.29                                                                        |

2

3

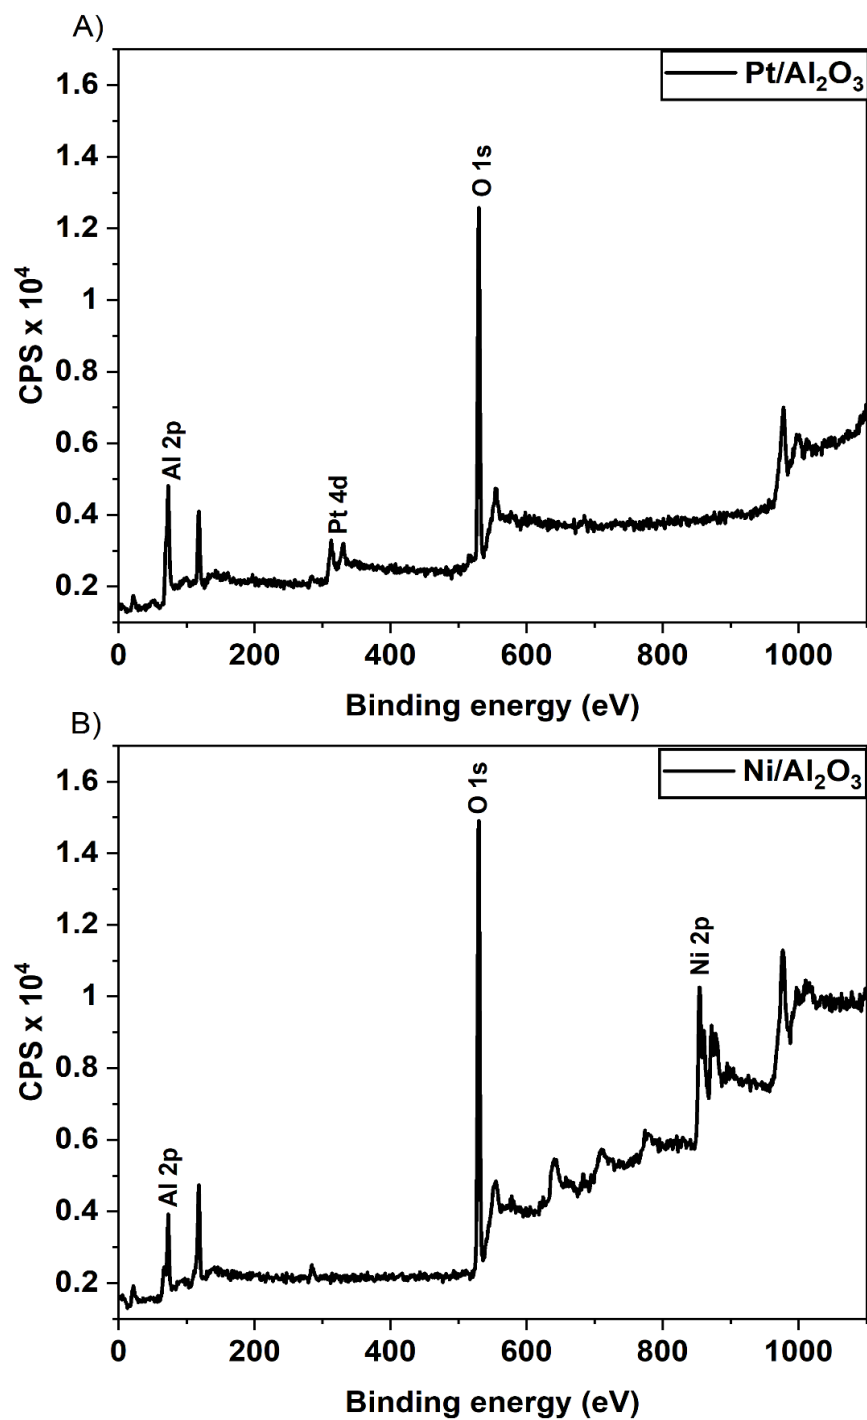

1

2

3

**Figure S1.** XPS survey scan for a) Pt/Al<sub>2</sub>O<sub>3</sub>, and b) Ni/Al<sub>2</sub>O<sub>3</sub>.

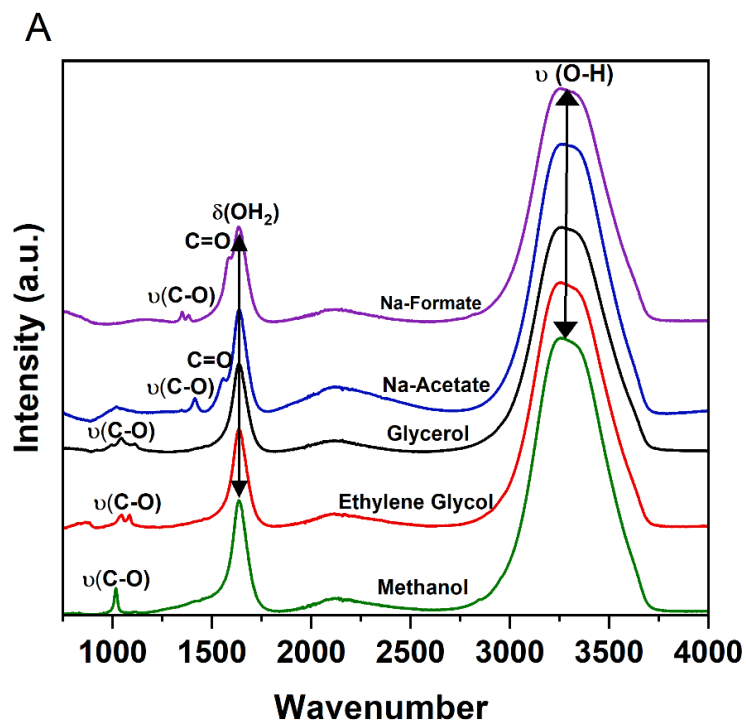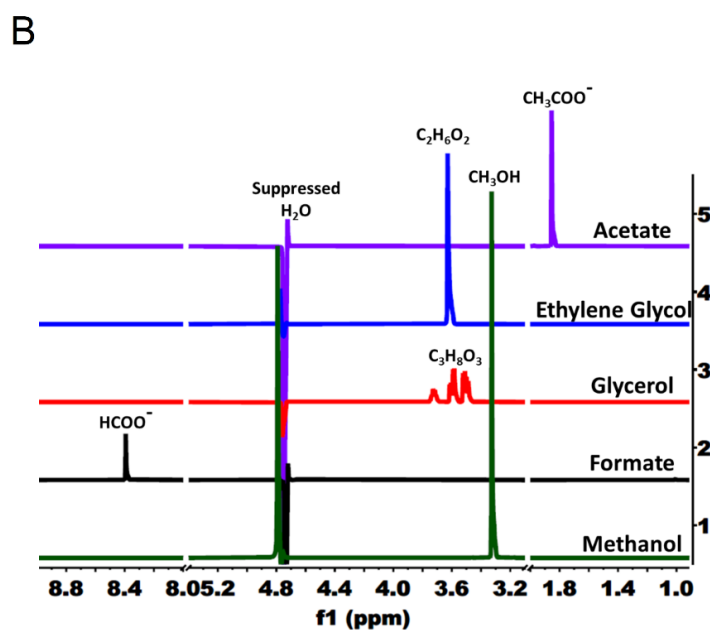

1

2 **Figure S2.** a) FTIR spectra of 3wt% methanol, formate glycerol, ethylene glycol and acetate  
 3 feedstocks.) NMR spectra of 3wt% methanol, formate glycerol, ethylene glycol and acetate  
 4 feedstocks.

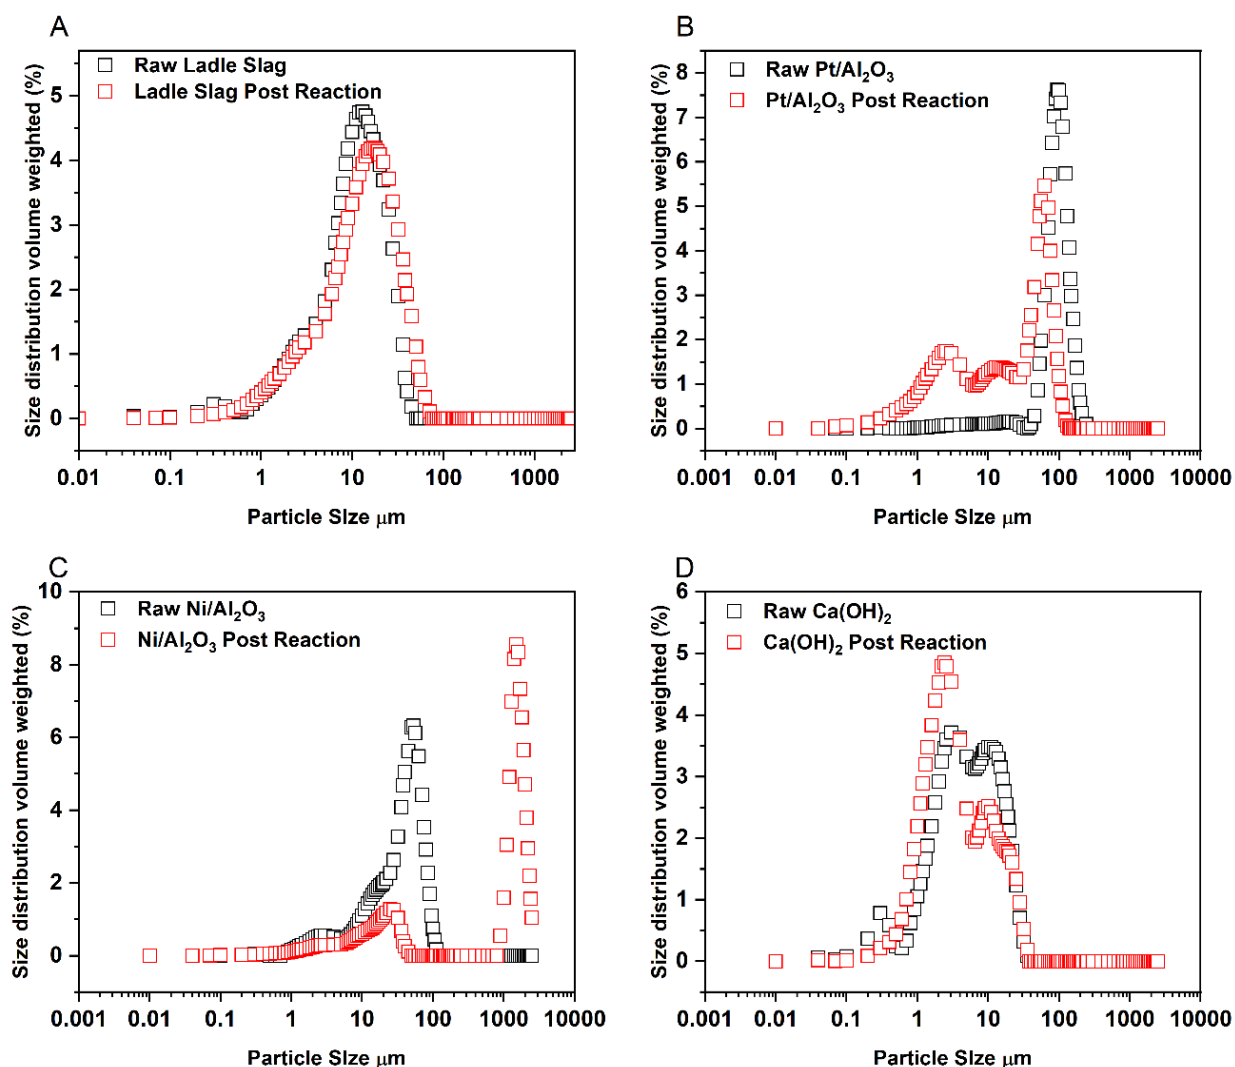

1

2 **Figure S3.** Volume weighted particle size distributions for: (a) Ladle Slag before and after reaction  
 3 using 3wt% model oxygenate bearing wastewater as feedstock, (b) Pt/ $\text{Al}_2\text{O}_3$ , catalyst before and  
 4 after reaction using 3wt% methanol as feedstock in the absence of an alkaline sorbent, (c) Ni/ $\text{Al}_2\text{O}_3$   
 5 catalyst before and after reaction using 3wt% methanol as feedstock in the absence of an alkaline  
 6 sorbent, and (d)  $\text{Ca}(\text{OH})_2$  before and after reaction using 3wt% methanol as feedstock. Reactions  
 7 were carried out at 50 bar and temperatures of 240  $^\circ\text{C}$ .

8

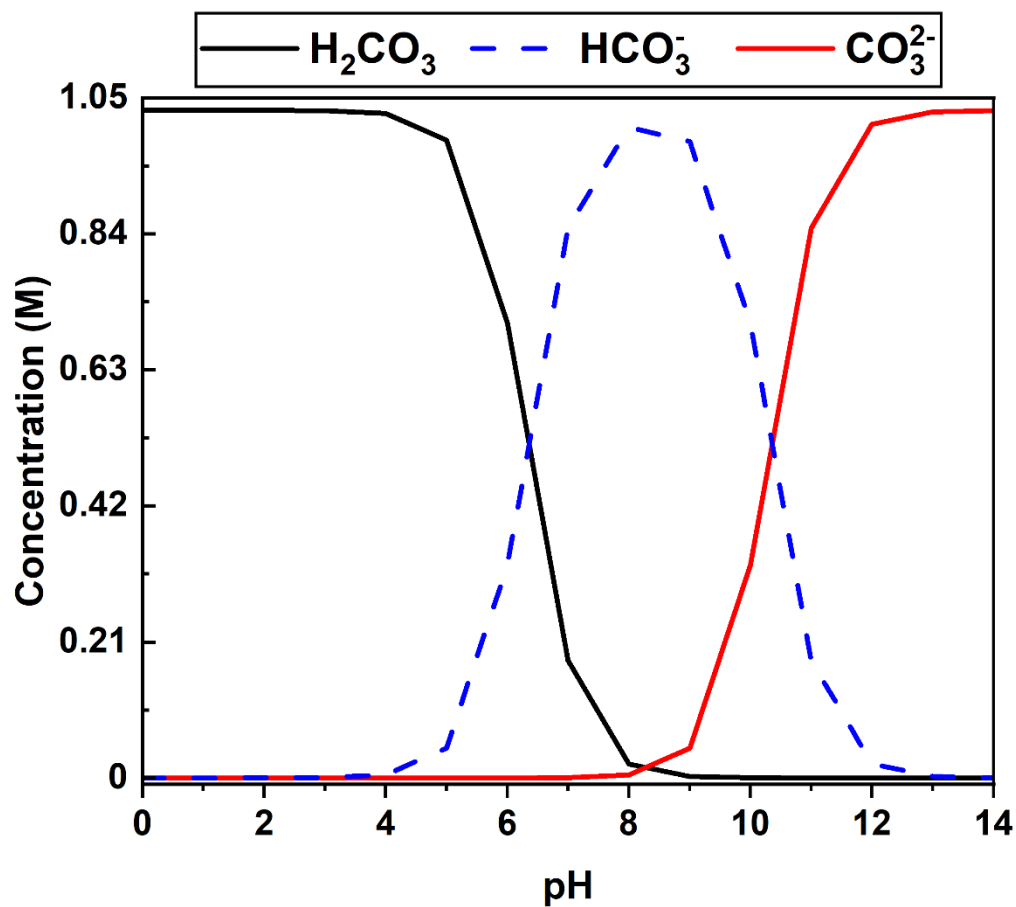

1

2 **Figure S4.** The concentrations of [H<sub>2</sub>CO<sub>3</sub>\*<sub>(aq)</sub>], [HCO<sub>3</sub><sup>-</sup><sub>(aq)</sub>], and [CO<sub>3</sub><sup>2-</sup><sub>(aq)</sub>] as a function of pH in  
 3 a closed system at maximum CO<sub>2</sub> concentration of ~ 1M.

4

5

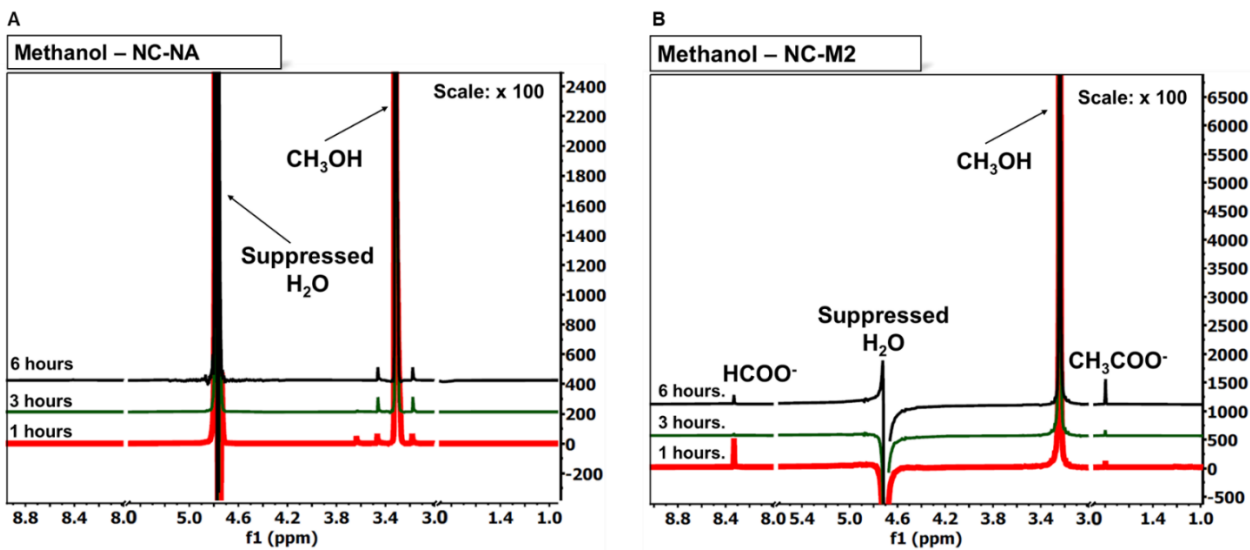

1  
2  
3  
4  
5  
6  
7  
8  
9  
10  
11  
12  
13  
14  
15  
16  
17  
18  
19  
20  
21

**Figure S5.** NMR analysis for liquid product from reforming 3wt% methanol without a catalyst a) no catalyst and no alkaline sorbent, b) no catalyst with an alkaline sorbent using the mode 2 configuration. Reactions were carried out at 50 bar, and temperatures of 240<sup>0</sup>C.

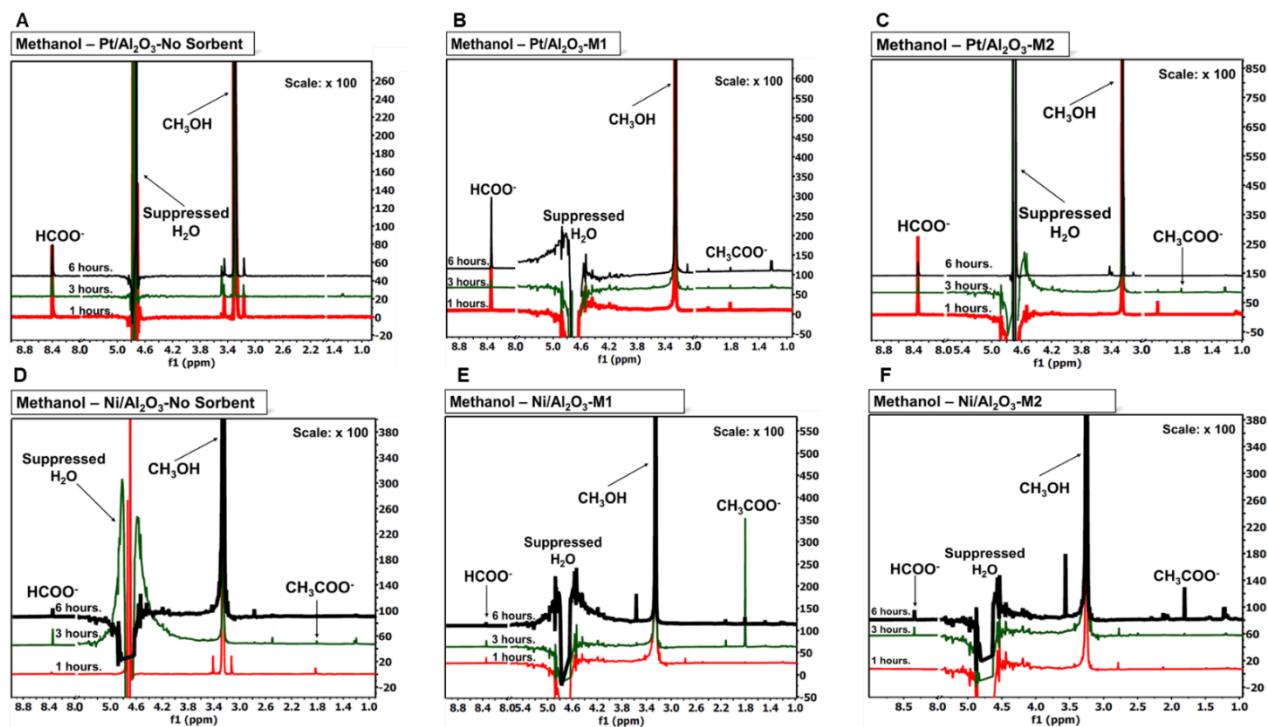

1  
 2  
 3 **Figure S6.** NMR analysis for liquid product from reforming 3wt% methanol in the presence of a  
 4 catalyst a) reforming was carried out over Pt/Al<sub>2</sub>O<sub>3</sub> catalyst without an alkaline sorbent. b)  
 5 reforming was carried out using Pt/Al<sub>2</sub>O<sub>3</sub> catalyst with an alkaline sorbent using the mode 1  
 6 configuration c) reforming was carried out using Pt/Al<sub>2</sub>O<sub>3</sub> catalyst with an alkaline sorbent using  
 7 the mode 2 configuration. d) reforming was carried out over Ni/Al<sub>2</sub>O<sub>3</sub> catalyst without an alkaline  
 8 sorbent, e) reforming was carried out using Ni/Al<sub>2</sub>O<sub>3</sub> catalyst with an alkaline sorbent using the  
 9 mode 1 configuration f) reforming was carried out using Ni/Al<sub>2</sub>O<sub>3</sub> catalyst with an alkaline sorbent  
 10 using the mode 2 configuration Reactions were carried out at 50 bar, and temperatures of 240<sup>0</sup>C.

**A: Ni/Al<sub>2</sub>O<sub>3</sub> Catalyst - NA**

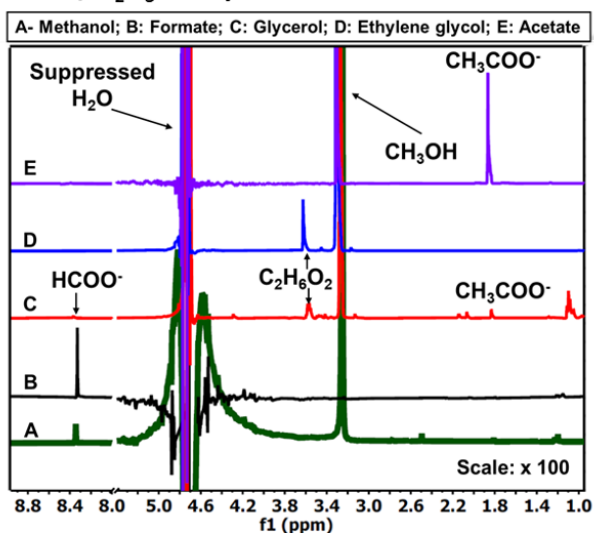

**B: Ni/Al<sub>2</sub>O<sub>3</sub> Catalyst – Alkaline Sorbent**

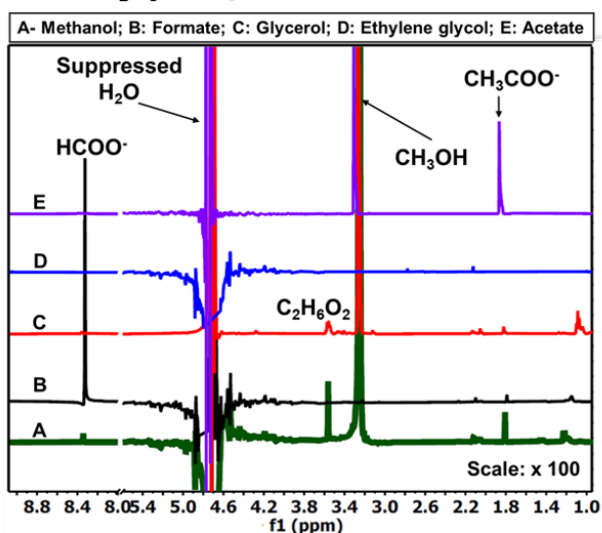

**C : Pt/Al<sub>2</sub>O<sub>3</sub> Catalyst - NA**

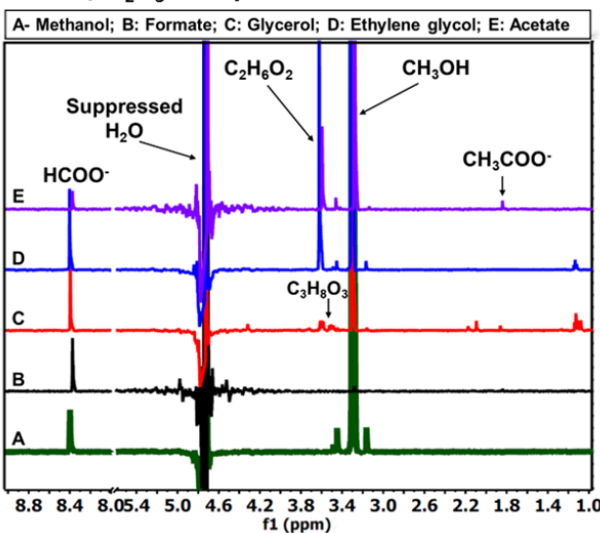

**D : Pt/Al<sub>2</sub>O<sub>3</sub> Catalyst – Alkaline Sorbent**

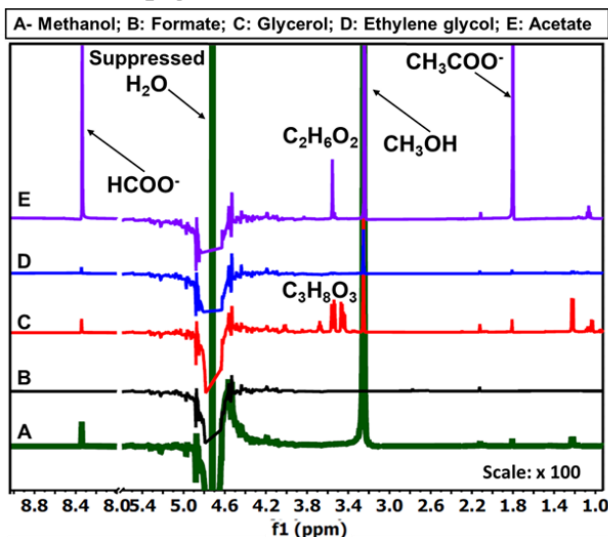

1

2 **Figure S7.** NMR analysis for liquid product from reforming 3wt% methanol, formate, glycerol,  
 3 ethylene glycol, and acetate over a catalyst a) reforming was carried out over Ni/Al<sub>2</sub>O<sub>3</sub> catalyst  
 4 without an alkaline sorbent. b) reforming was carried out using Ni/Al<sub>2</sub>O<sub>3</sub> catalyst with an alkaline  
 5 sorbent using the mode 2 configuration. c) reforming was carried out over Pt/Al<sub>2</sub>O<sub>3</sub> catalyst  
 6 without an alkaline sorbent. d) reforming was carried out using Pt/Al<sub>2</sub>O<sub>3</sub> catalyst with an alkaline  
 7 sorbent using the mode 2 configuration.

8

9



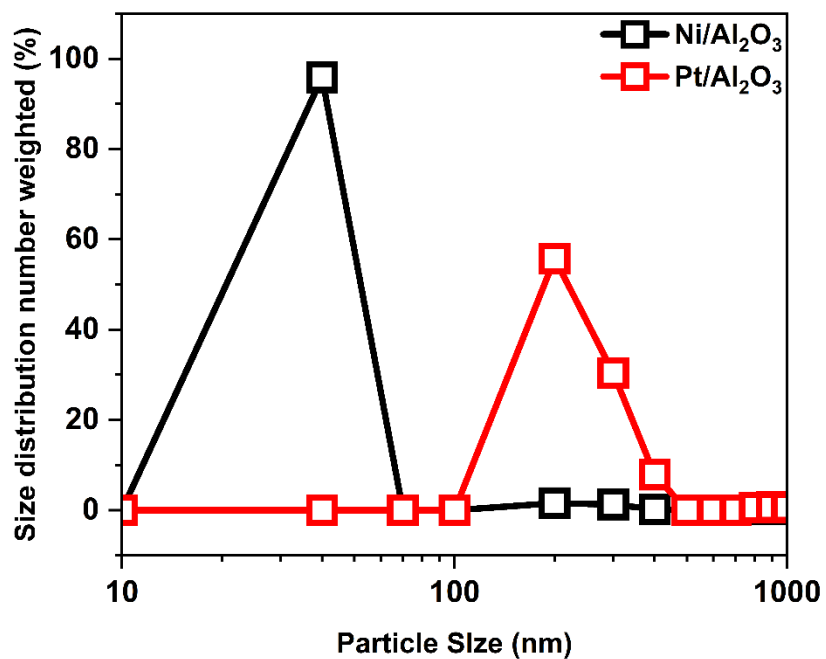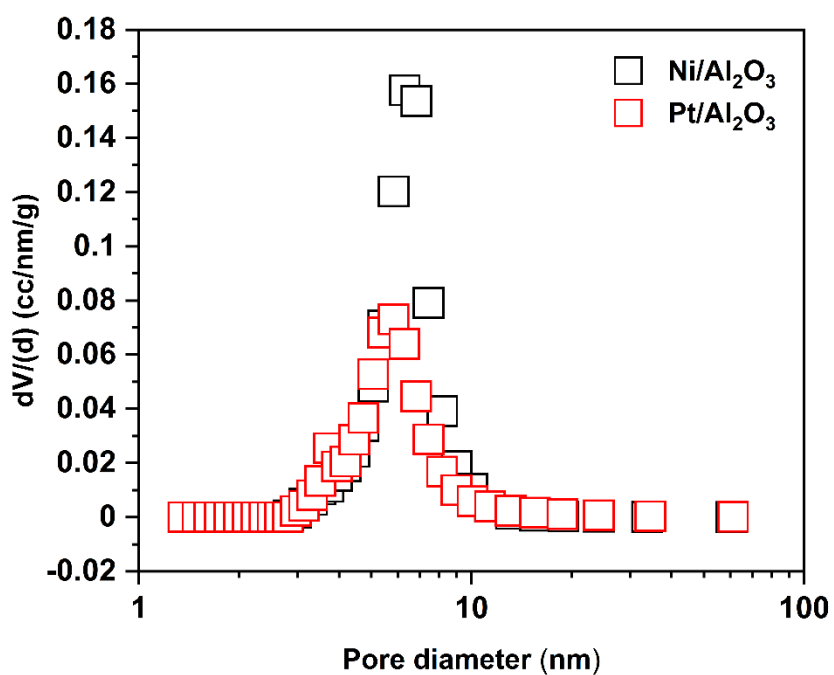

1

2 **Figure S8.** a) Number weighted particle size distributions and b) pore size distribution of catalysts  
 3 used for experiments.

4

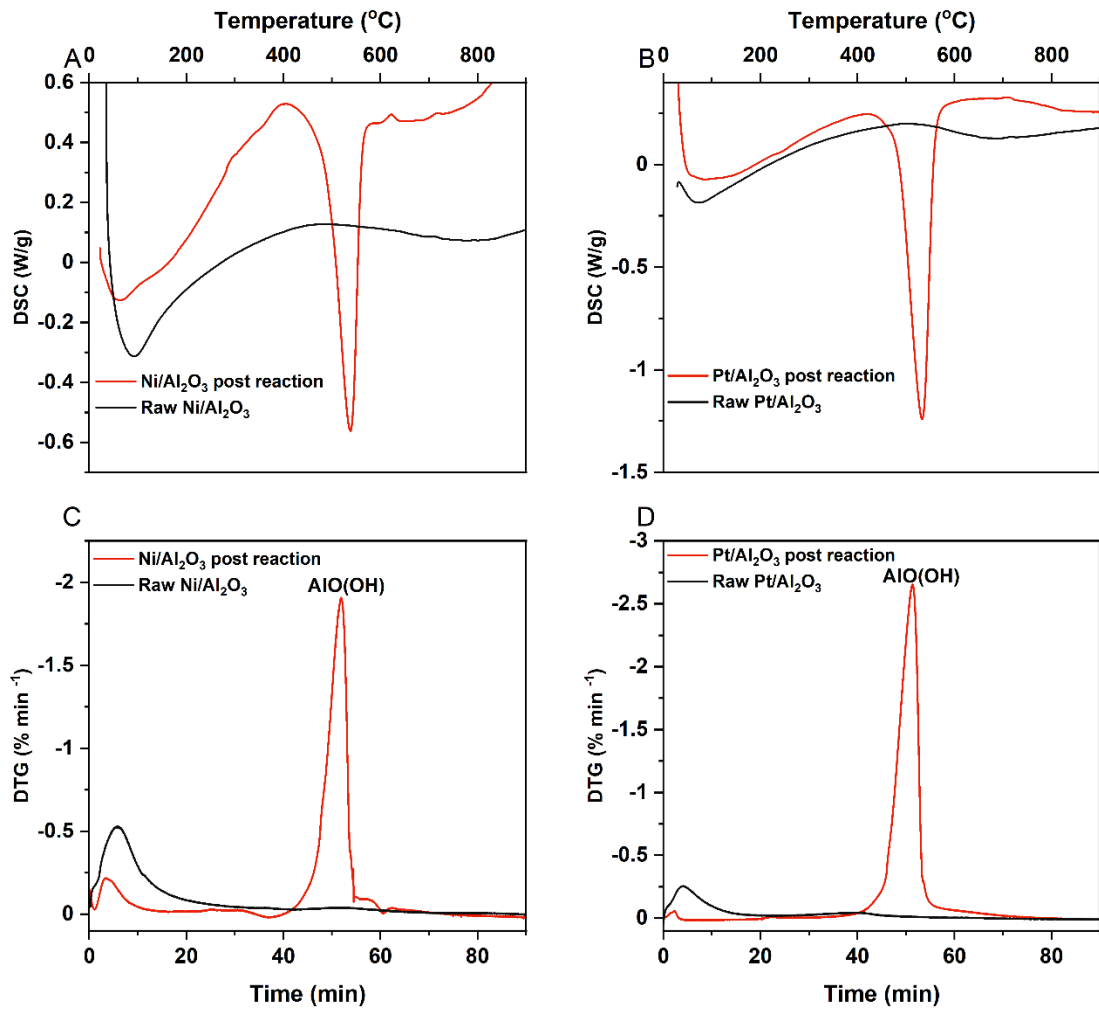

1  
2  
3  
4  
5

**Figure S9.** DTG and DSC curve for Ni/Al<sub>2</sub>O<sub>3</sub> and Pt/Al<sub>2</sub>O<sub>3</sub> catalyst before and after reaction

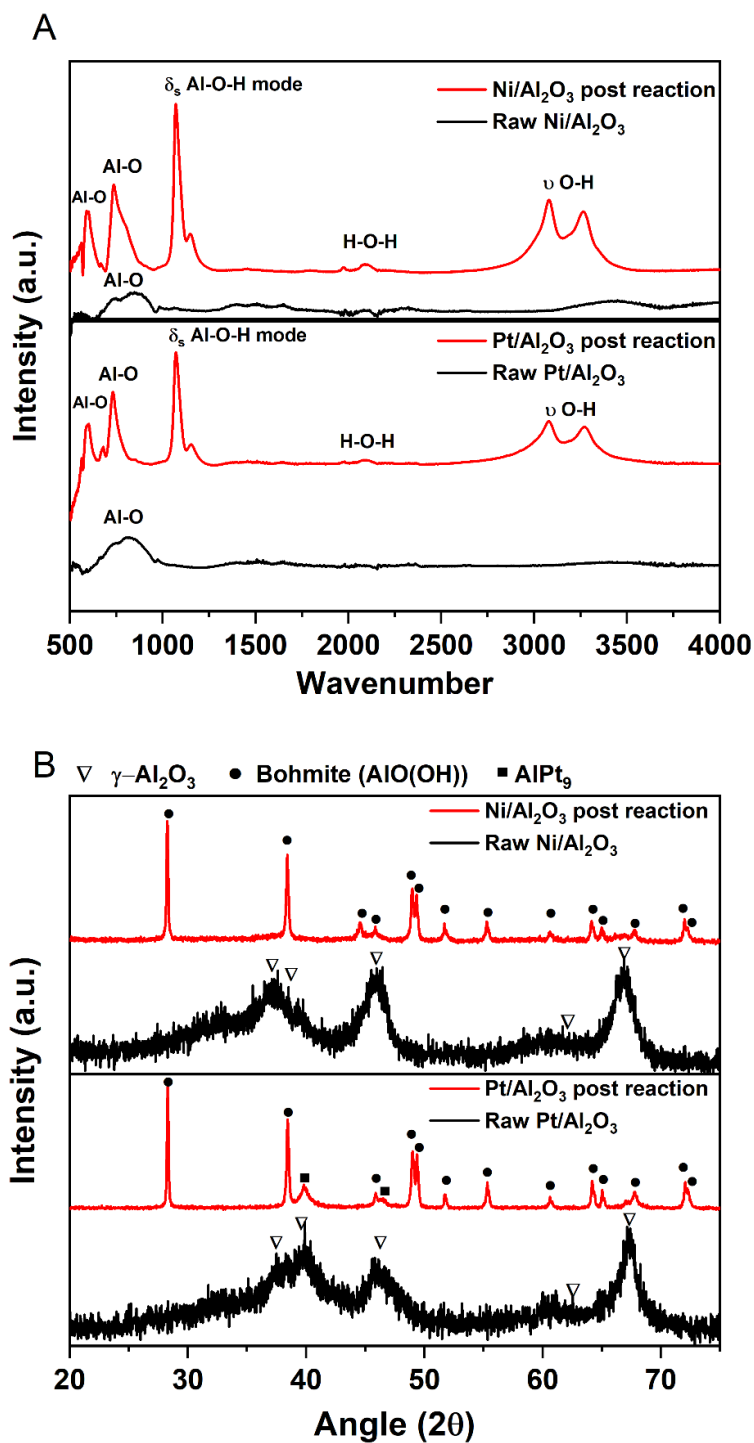

1

2 **Figure S10.** a) FTIR pattern for Ni/Al<sub>2</sub>O<sub>3</sub> and Pt/Al<sub>2</sub>O<sub>3</sub> before and after using 3 wt% methanol  
 3 as feedstock.in the absence of an alkaline sorbent. b) XRD pattern for Ni/Al<sub>2</sub>O<sub>3</sub> and Pt/Al<sub>2</sub>O<sub>3</sub>  
 4 before and after using 3wt% methanol as feedstock.in the absence of an alkaline sorbent.

5
